# Supplementary material for: Theoretical studies on the form and effect of N-doping in an ZnGa2O4 photocatalyst
Source: Royal Society of Chemistry journal article supplement (doi:10.1039/c6ra09655g), 2016-01-01
Supplement: c6ra09655g1.pdf [file c6ra09655g1.pdf]

## Electronic supplementary information

### Theoretical studies on the form and effect of N-doping in ZnGa<sub>2</sub>O<sub>4</sub> photocatalyst

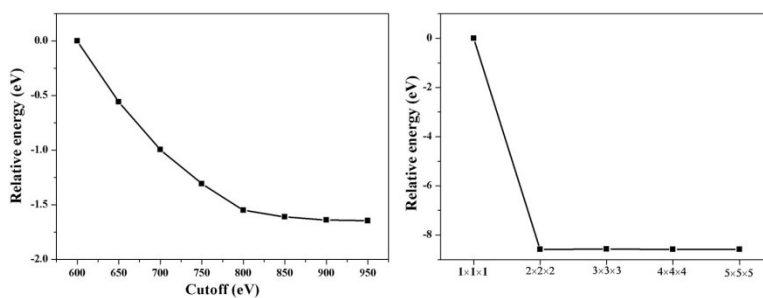

Figure S1. The convergence tests for cutoff and kpoints before theoretical calculations.

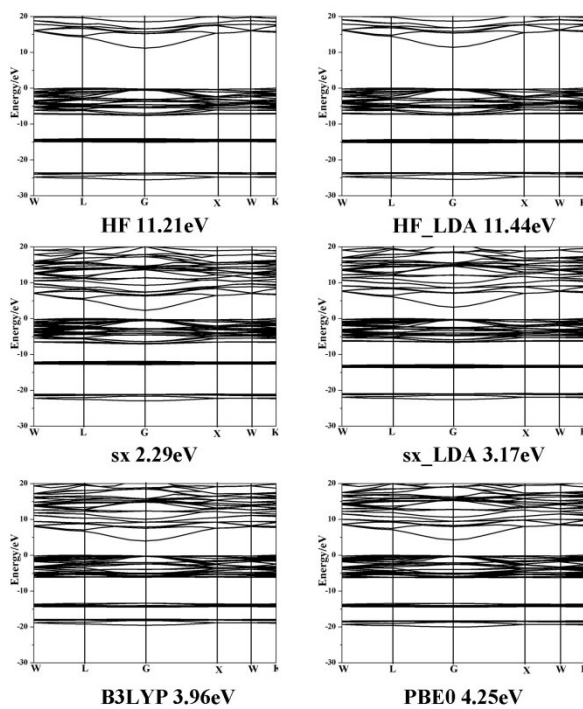

Figure S2. The band structures of ZnGa<sub>2</sub>O<sub>4</sub> calculated by HF, HF\_LDA, sx (screened exchange functional), sx\_LDA, B3LYP, and PBE0.

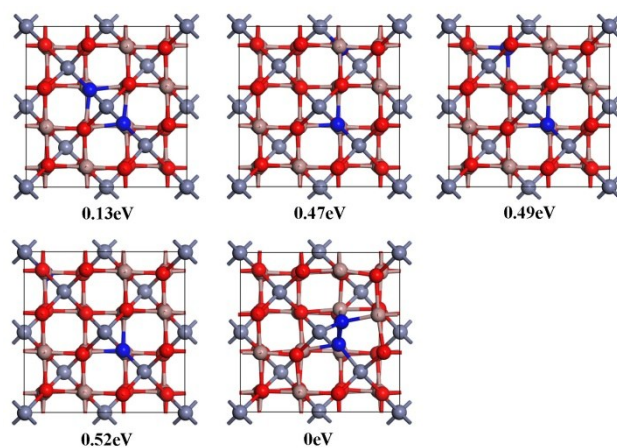

Figure S3. The structures and the relative energies of  $2N_s$ -doped  $ZnGa_2O_4$  with different doping sites.

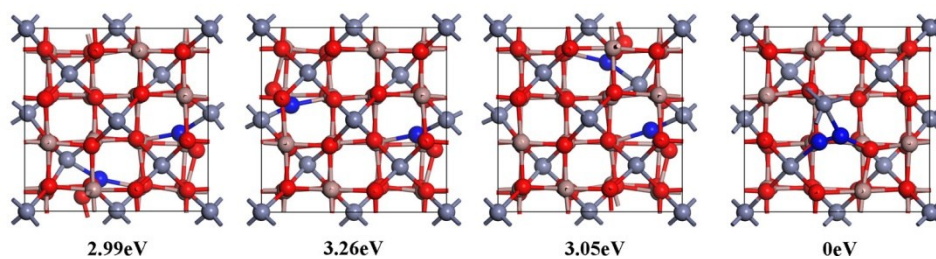

Figure S4. The structures and the relative energies of  $2N_i$ -doped  $ZnGa_2O_4$  with different doping sites.

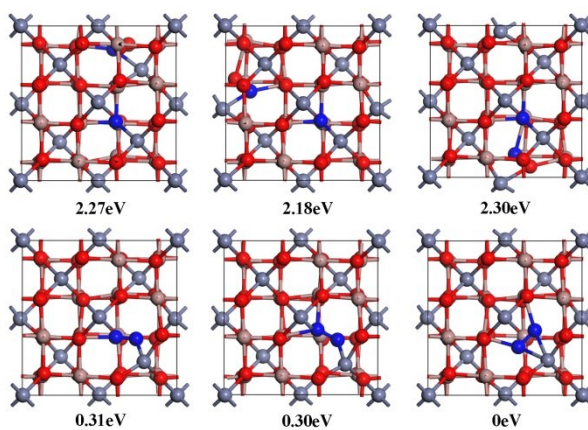

Figure S5. The structures and the relative energies of  $N_s+N_i$ -doped  $ZnGa_2O_4$  with different doping sites.
